# Supplementary material for: Synthesis and screening of novel 2,4-bis substituted quinazolines as tubulin polymerization promoters and antiproliferative agents
Source: Royal Society of Chemistry journal article supplement (doi:10.1039/d4md00755g), 2025-01-01

## **Synthesis and Screening of Novel 2,4-Bis Substituted quinazolines as Tubulin Polymerization Promoters and Antiproliferative Agents**

*<sup>a</sup>Department of Pharmaceutical Sciences and Natural Products, Central University of Punjab, Bathinda, Punjab, India-151401.*

*<sup>b</sup>Laboratory of Organic and Medicinal Chemistry, Department of Chemistry, Central University of Punjab, Bathinda, Punjab, India-151401.*

*<sup>c</sup>Department of Zoology, School of Biological Sciences, Central University of Punjab, Bathinda, Punjab, India-151401.*

*<sup>d</sup>Gitam School of Pharmacy, Hyderabad, Telangana, 502329, India.*

### **Corresponding author:**

**\*Prof. Vinod Kumar**

Laboratory of Organic and Medicinal Chemistry,

Department of Chemistry,

Central University of Punjab, Bathinda, Punjab, India-151401.

E-mail: [vpathania18@gmail.com](mailto:vpathania18@gmail.com); [vinod.kumar@cup.edu.in](mailto:vinod.kumar@cup.edu.in)

Phone No. +911642864214

# Supporting Information

## Spectra A4V-1

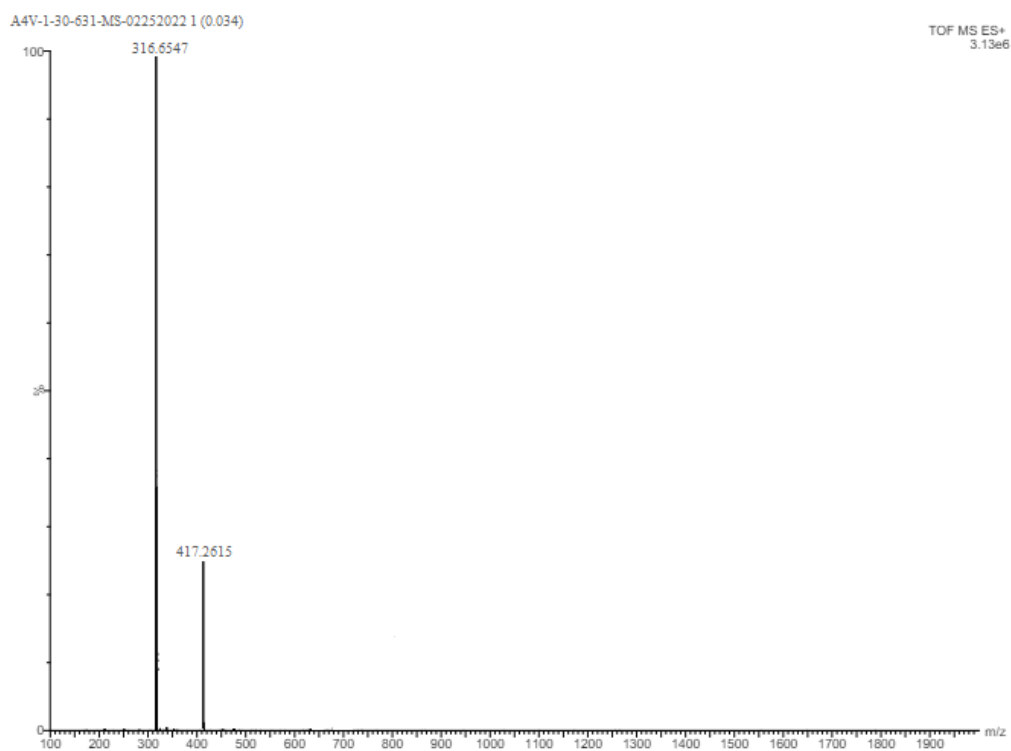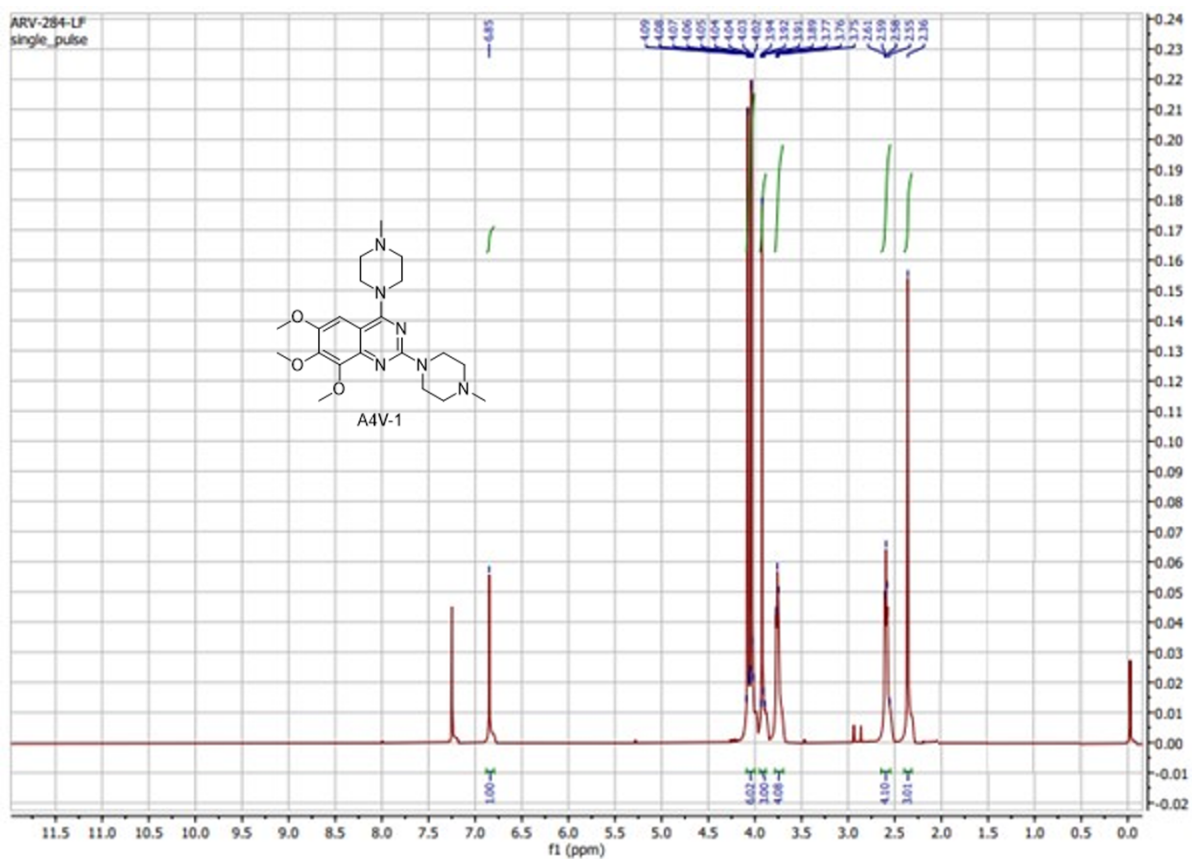

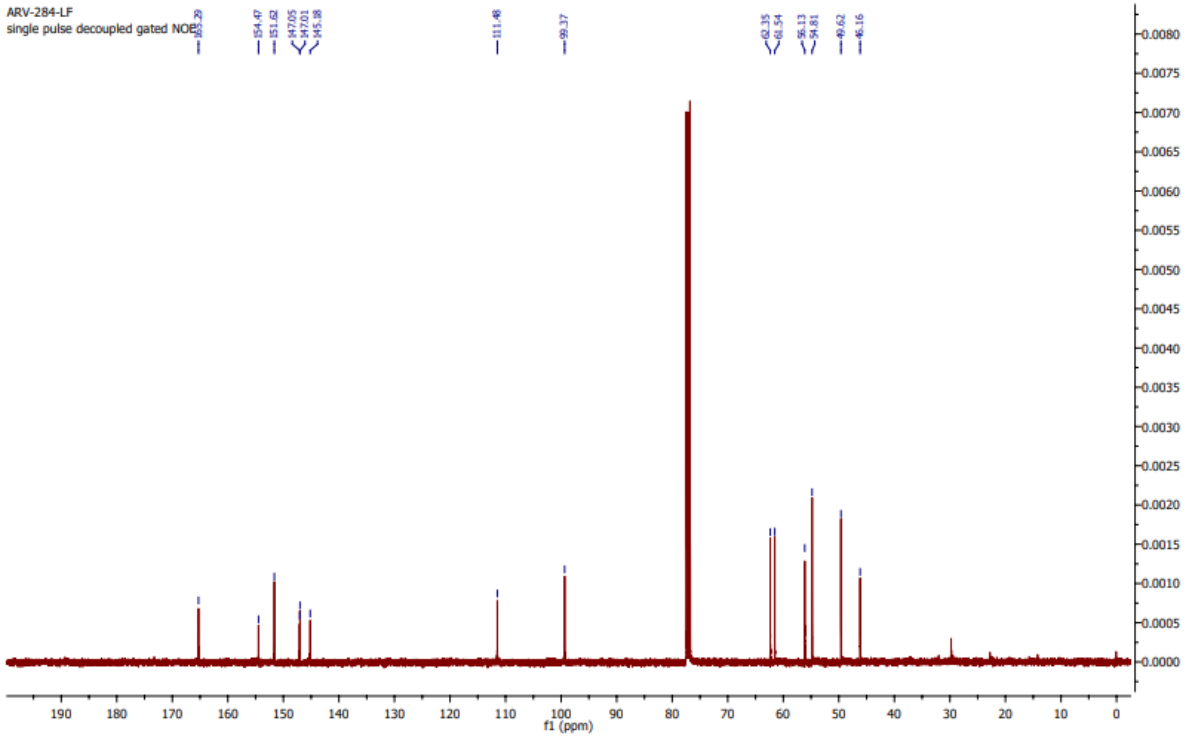

A4V-2

Sample Name : ARV TM  
Test Name : HRMS 1

IITRPR

XEVO G2 XS OTOF

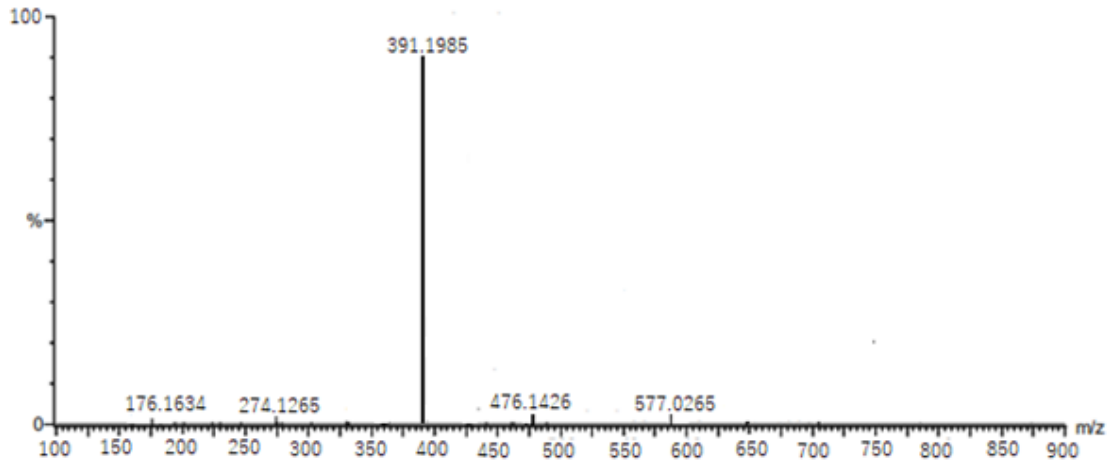



A4V-3

Sample Name : ARV-283  
Test Name : HRMS

IITRPR

XEVO G2-XS QTOF

1: TOF MS ES+  
5.52e+007

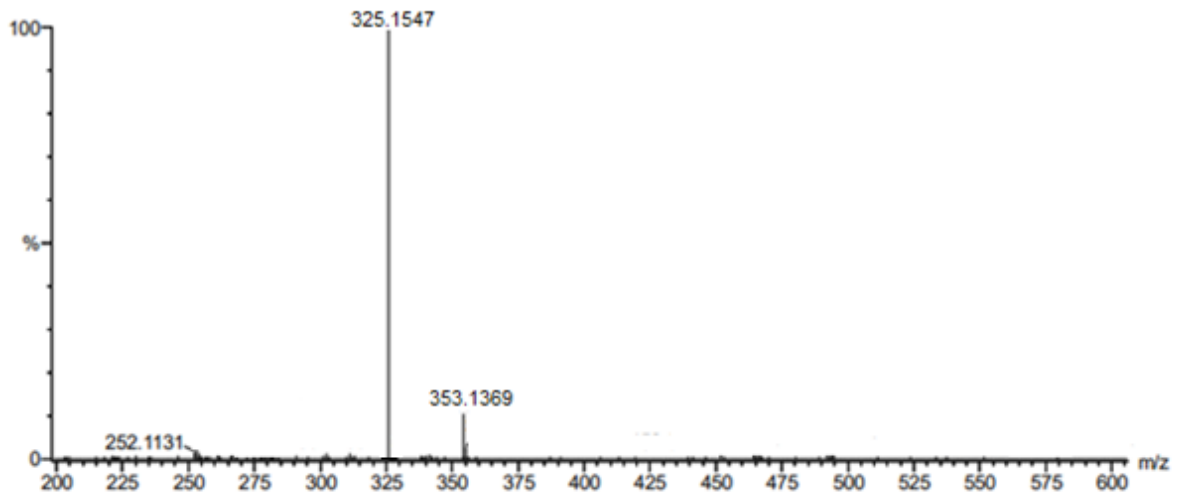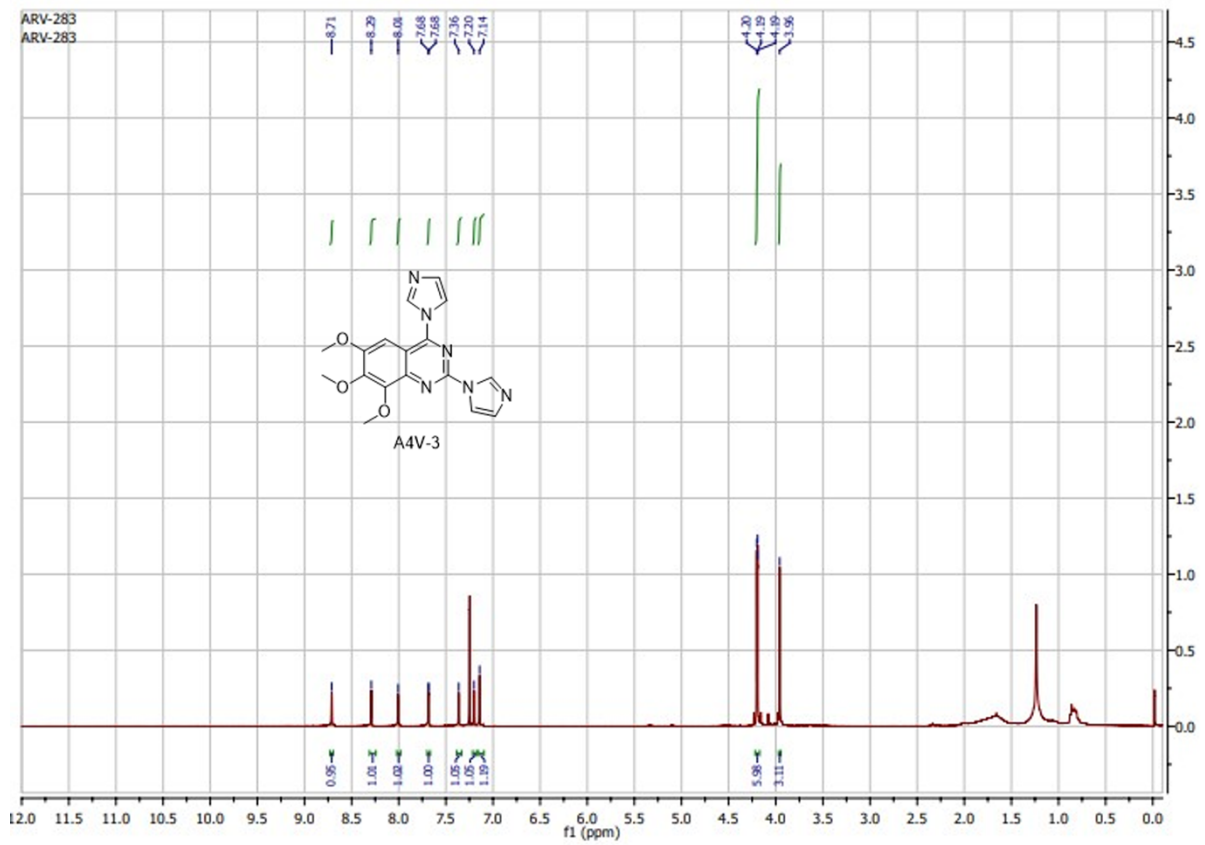

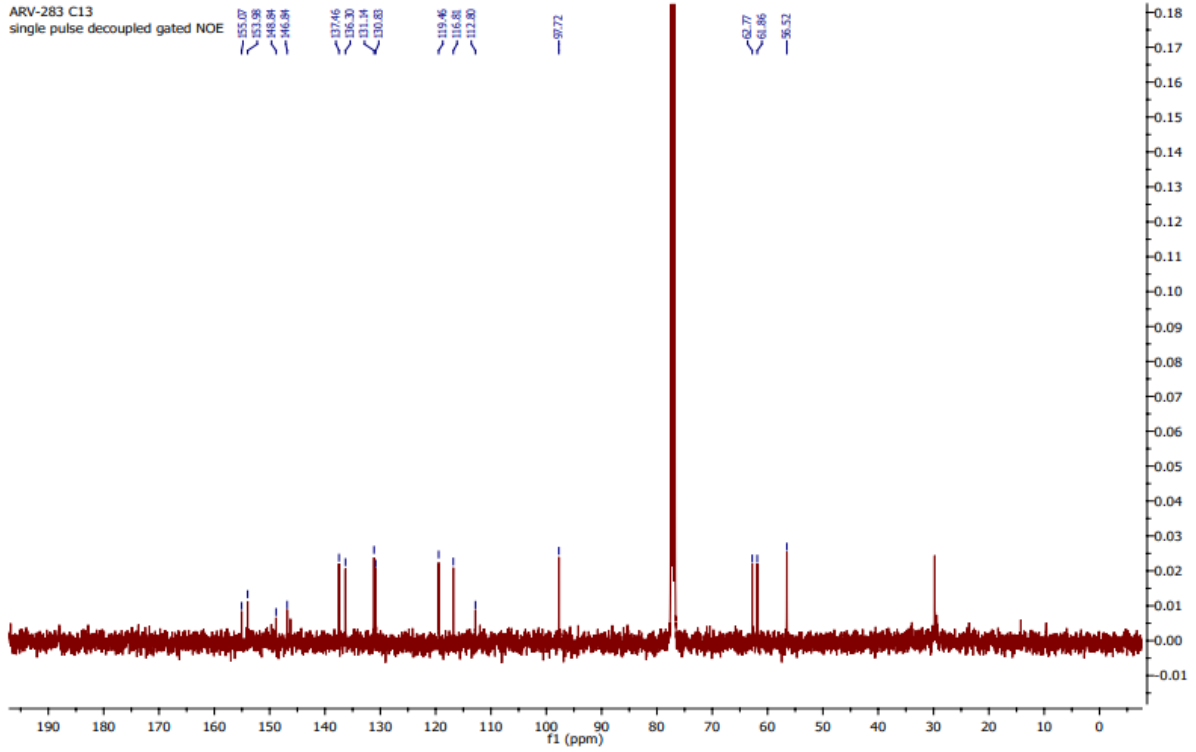

A4V-4

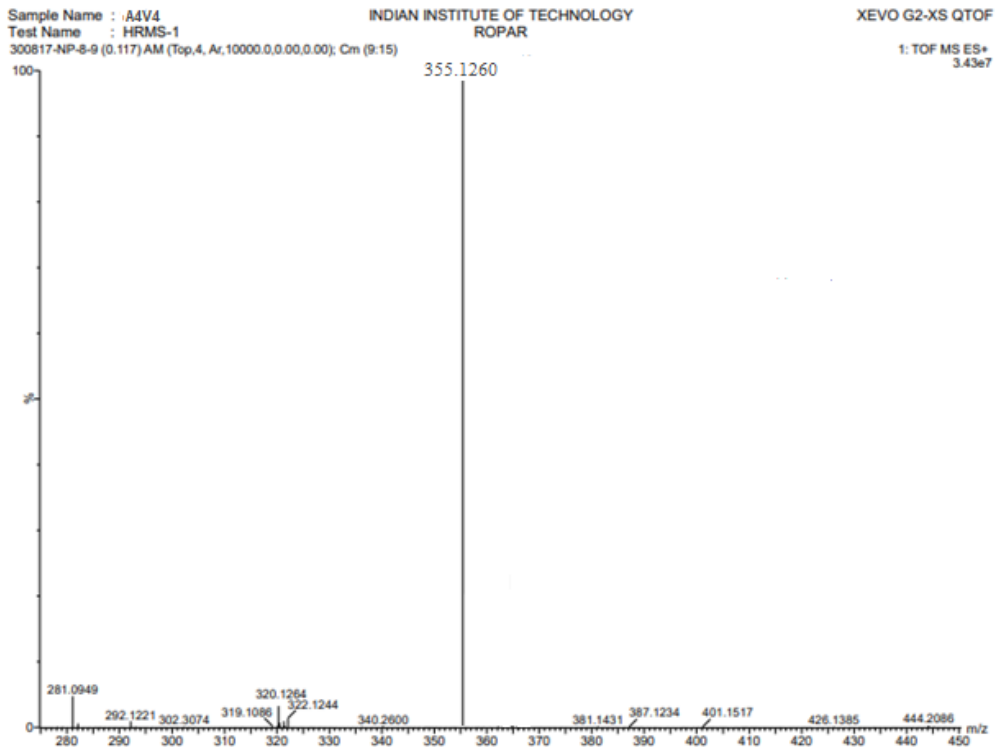

ARV-275

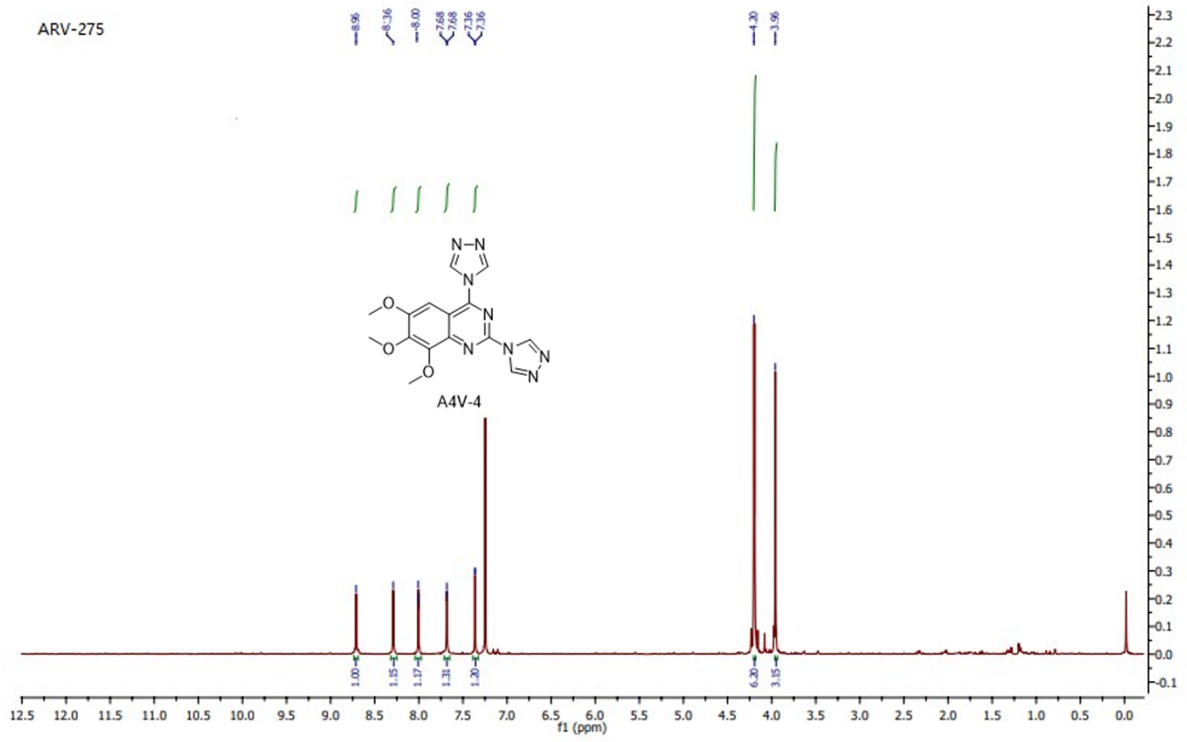

ARV-275

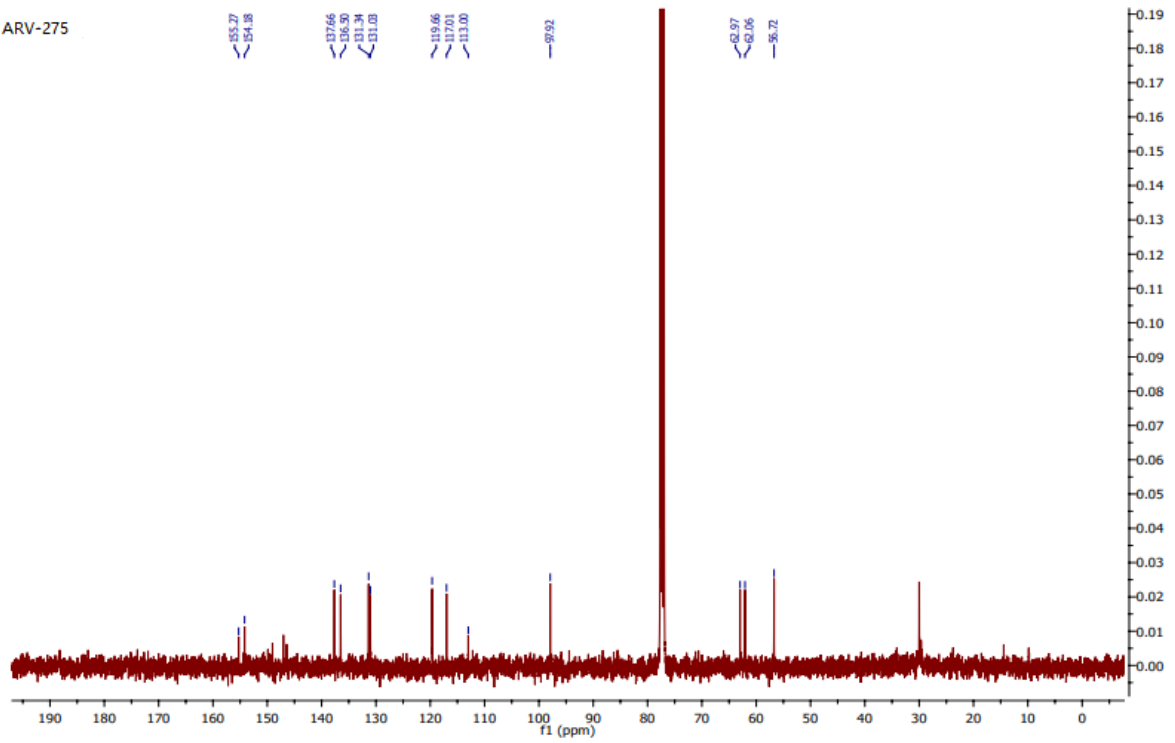

# A4V-5

Sample Name : ARV-282  
Test Name : HRMS-1  
INDIAN INSTITUTE OF TECHNOLOGY  
ROPAR  
XEVO G2-XS QTOF  
1: TOF MS ES+  
3.40e7

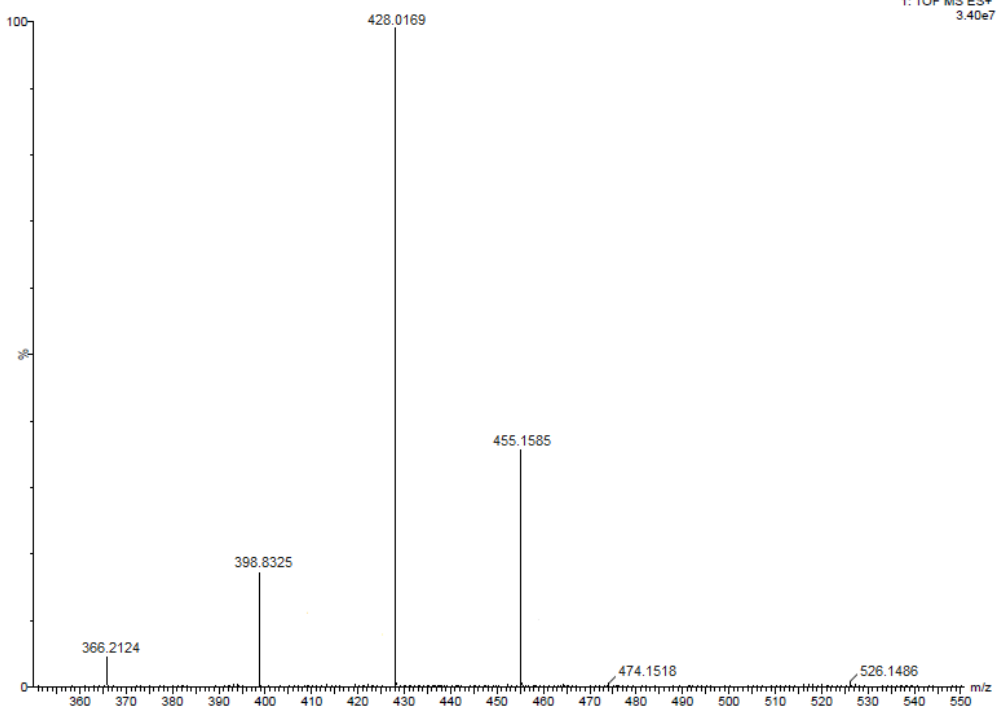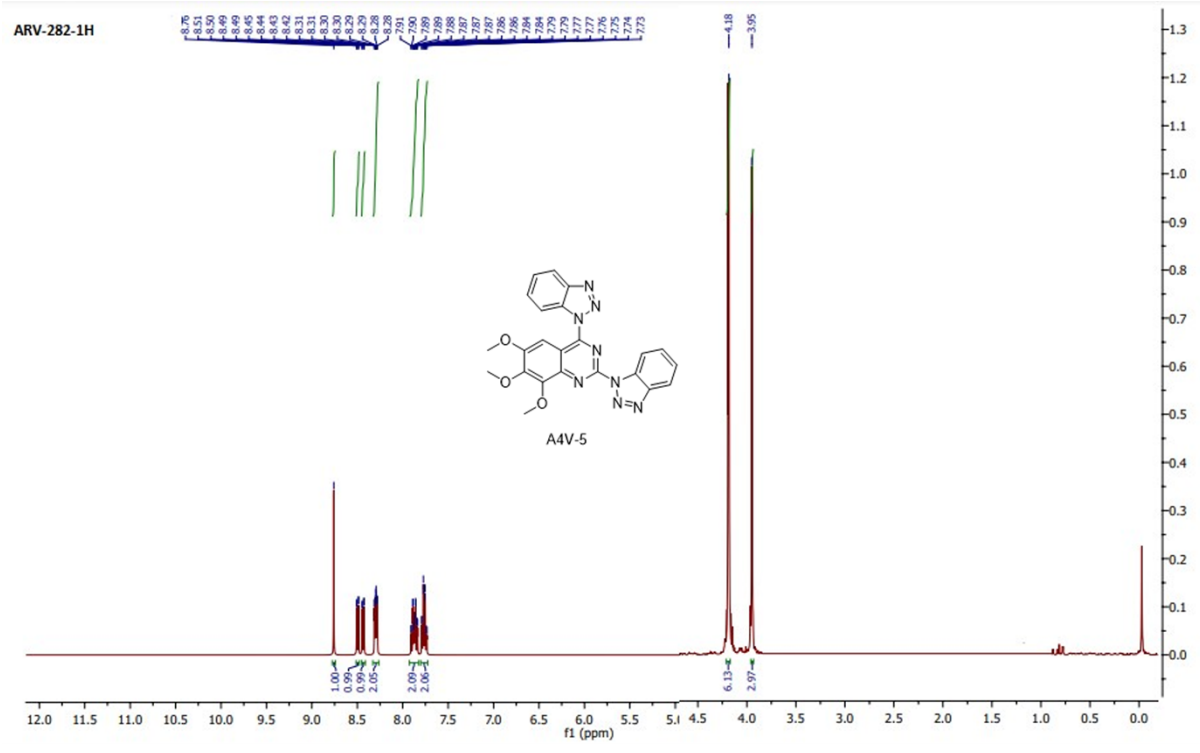



ARV-282-AC

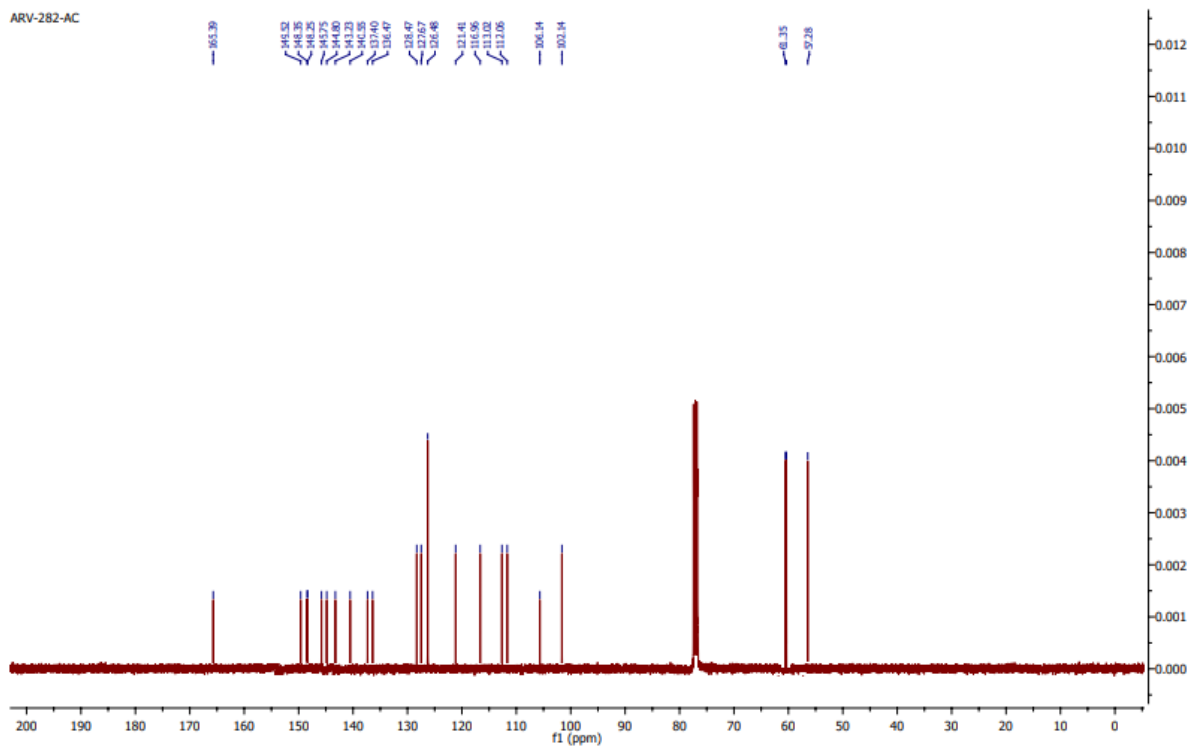

A4V-6

Sample Name ARV 271  
Test Name HRMS 1

IITRPR

XEVO G2 QS OTOF

1: TOF MS ES+  
9.37e+007

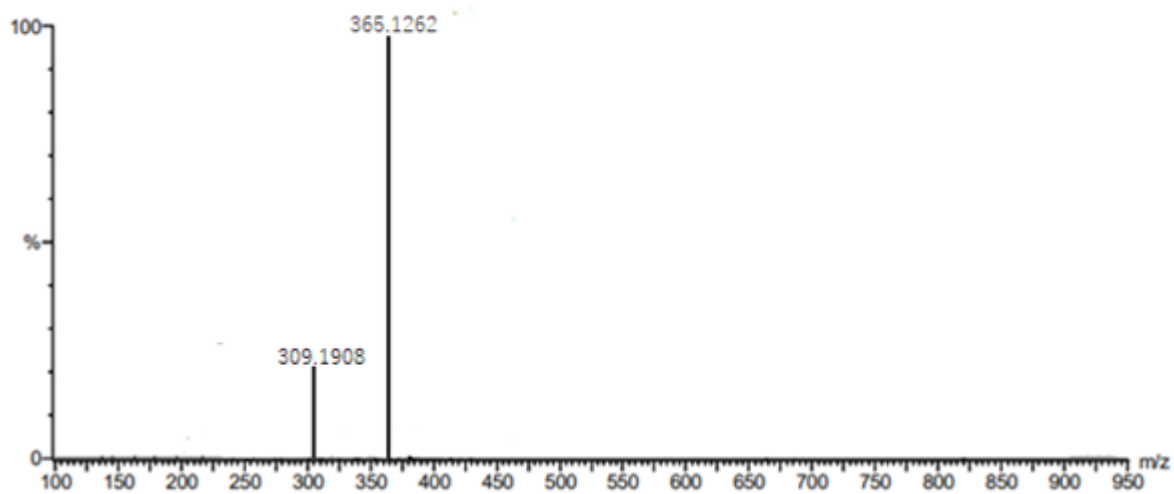

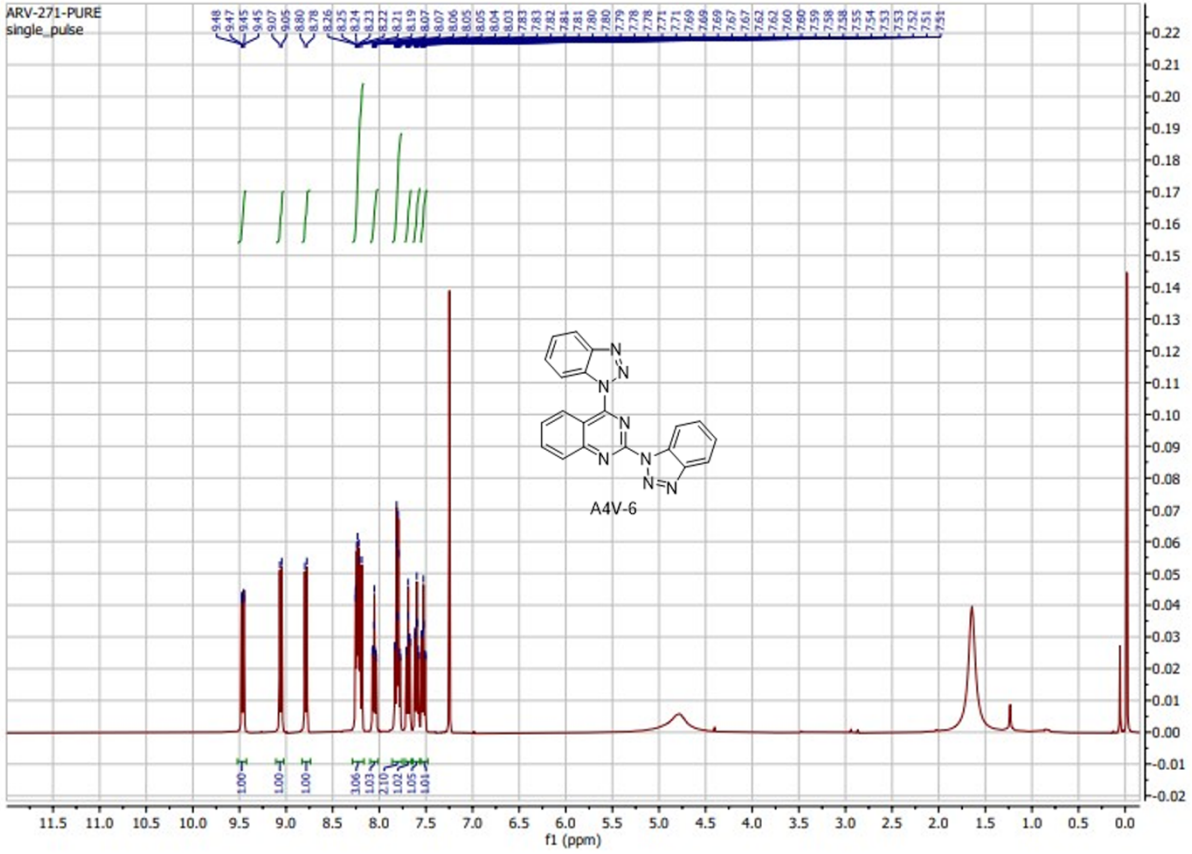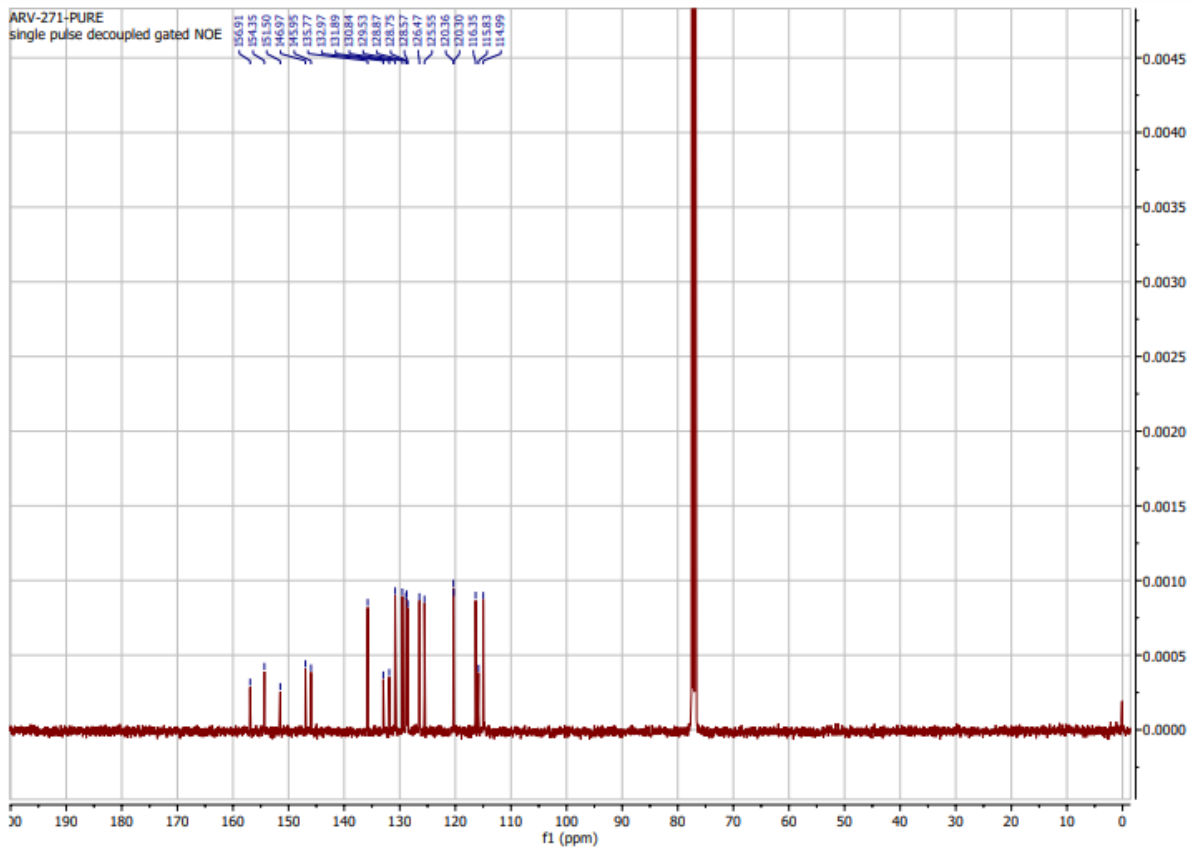

# A4V-7

Sample Name : A4V-7  
Test Name : HRMS-1

IITRPR

XEVO G2-XS QTOF

1: TOF MS ES+  
5.52e+007

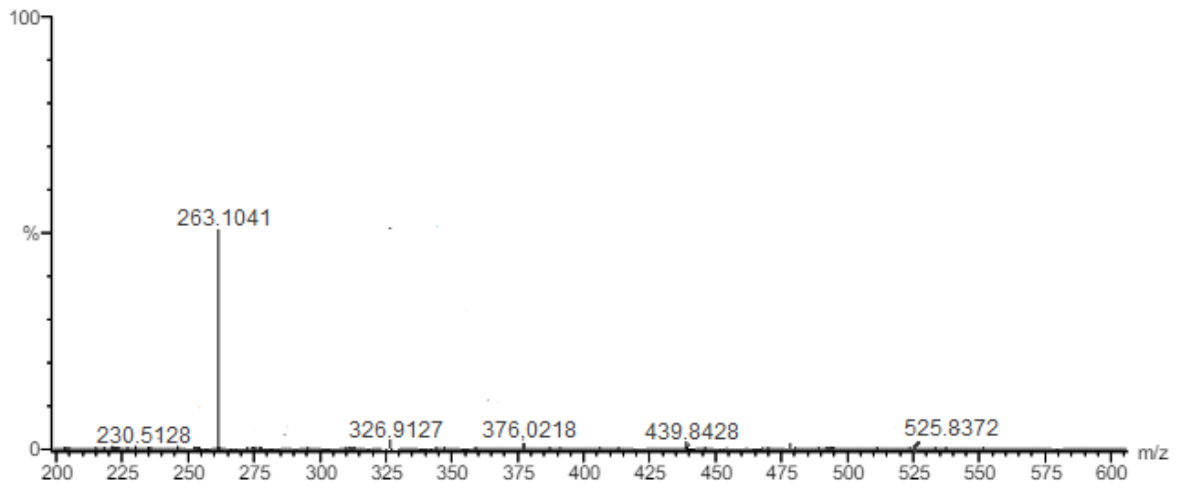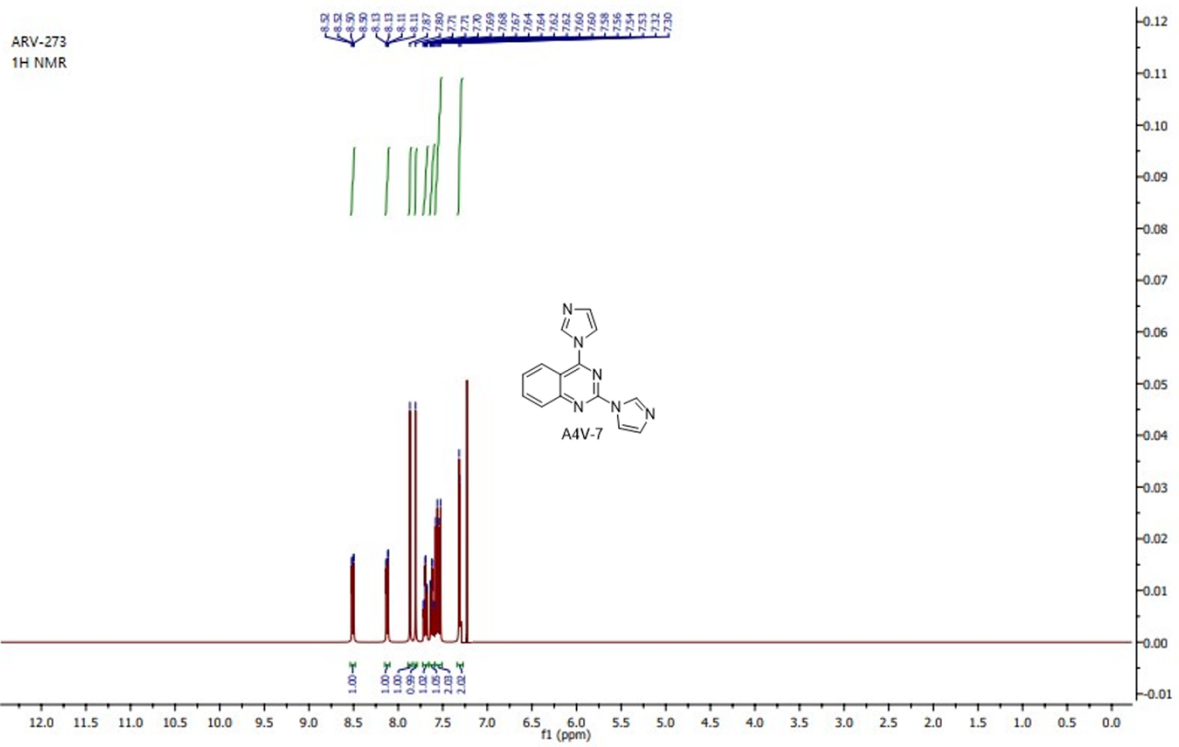

ARV-273

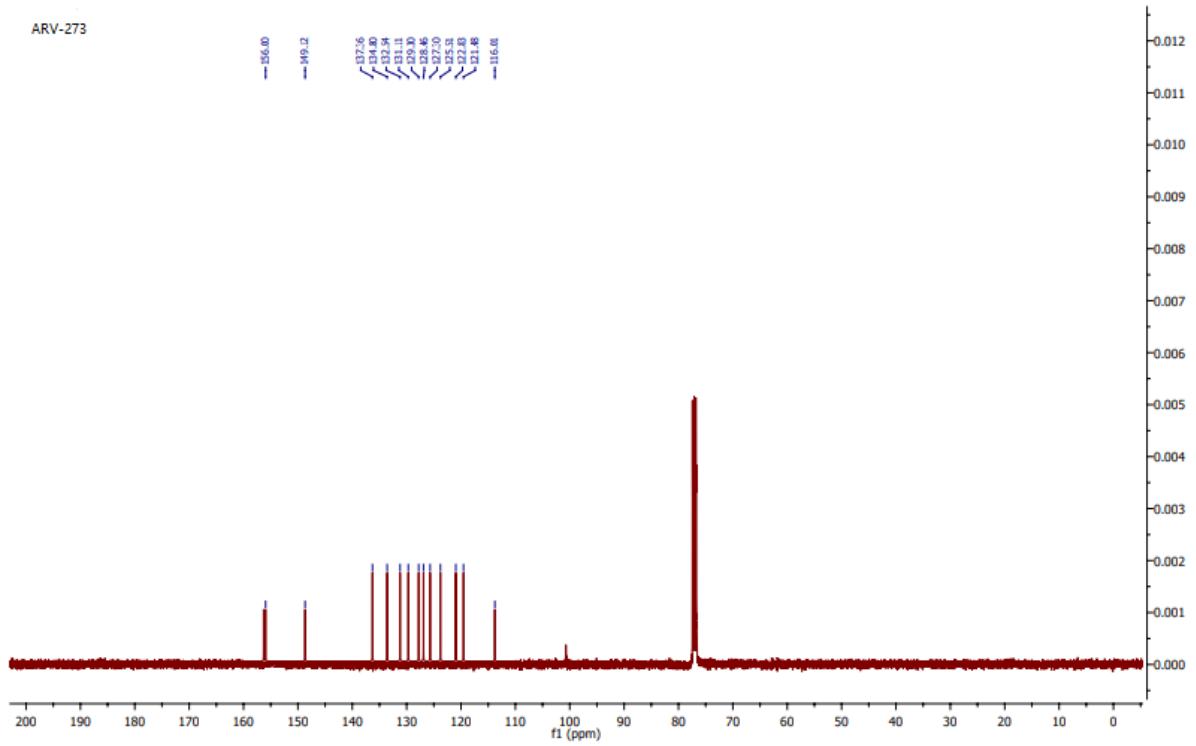

A4V-8

Sample Name : ARV 271

IITRPR

XEVO G2-XS QTOF

Test Name : HRMS-1

041219-BD-10 19 (0.203) AM2 (Ar,22000.0,0.00,0.00); Cm (19:20)

1: TOF MS ES+  
3.70e+007

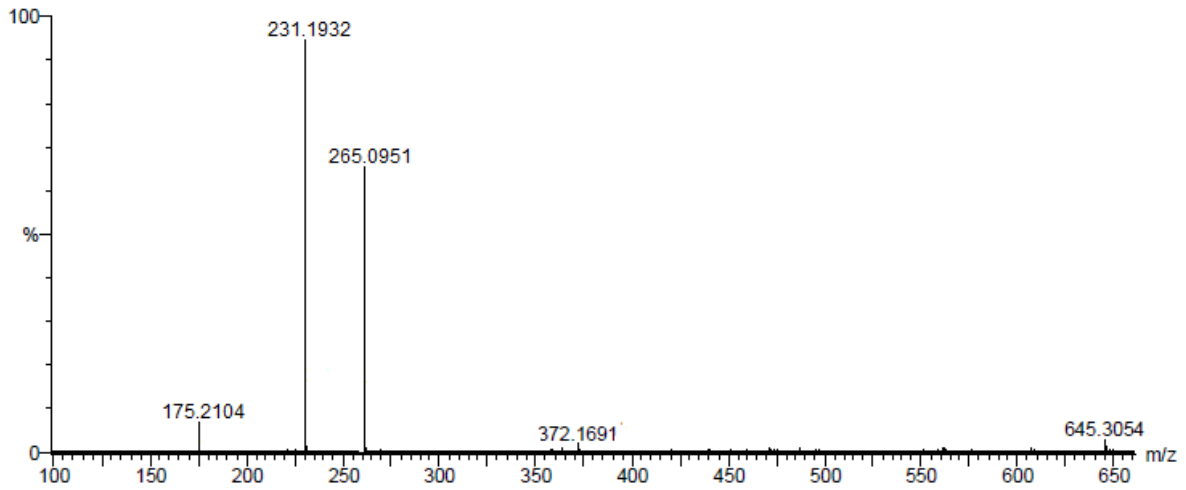

ARV-272-1H NMR

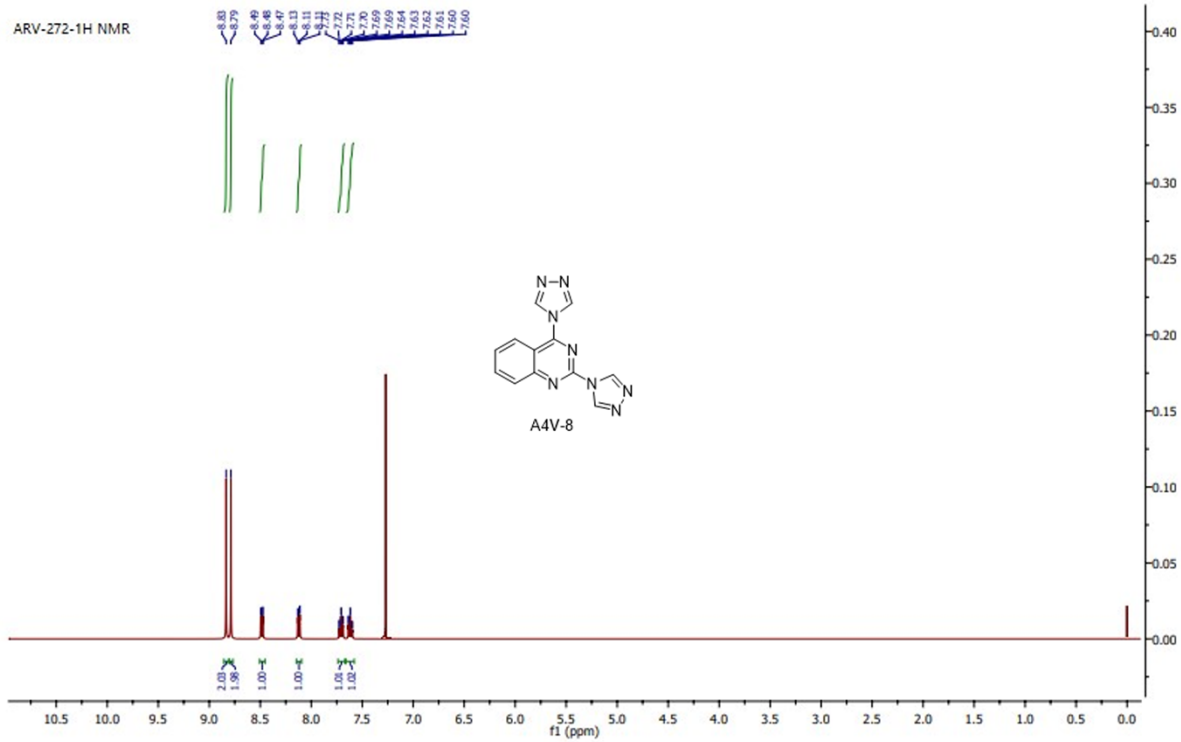

ARV-272

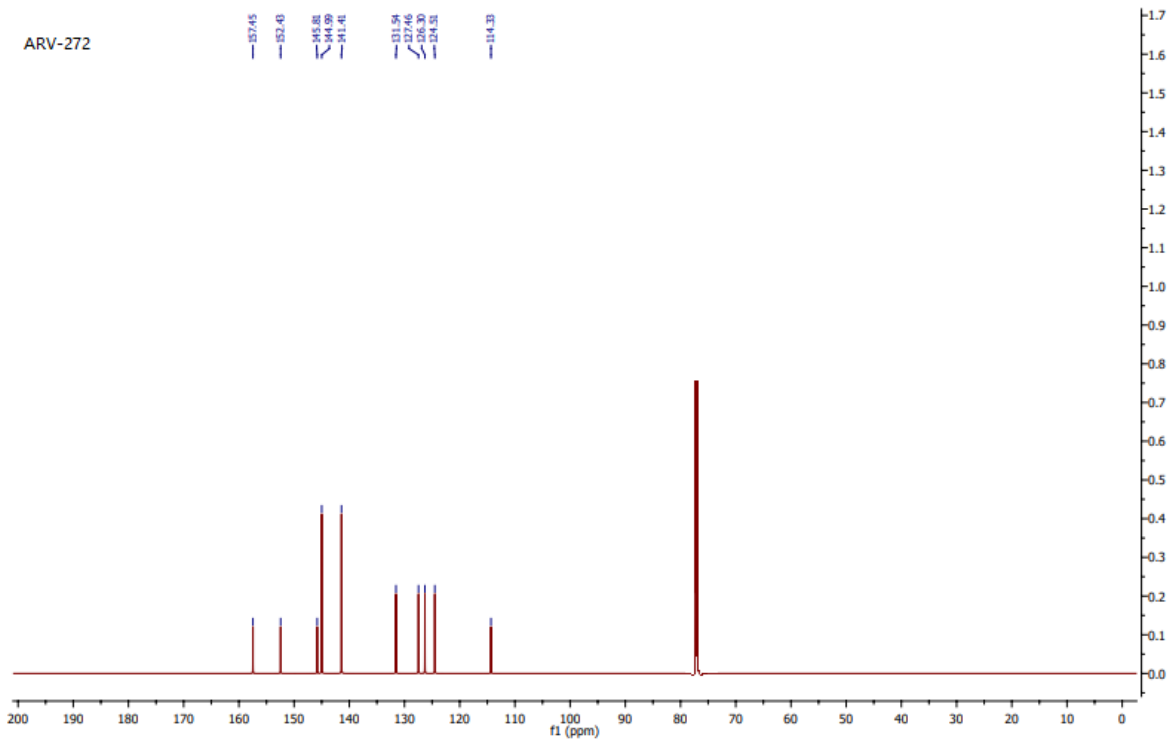

# A4V-9

Sample Name : A4V-9  
Test Name : HRMS-1

IITRPR

XEVO G2-XS QTOF

1: TOF MS ES+  
1.32e+008

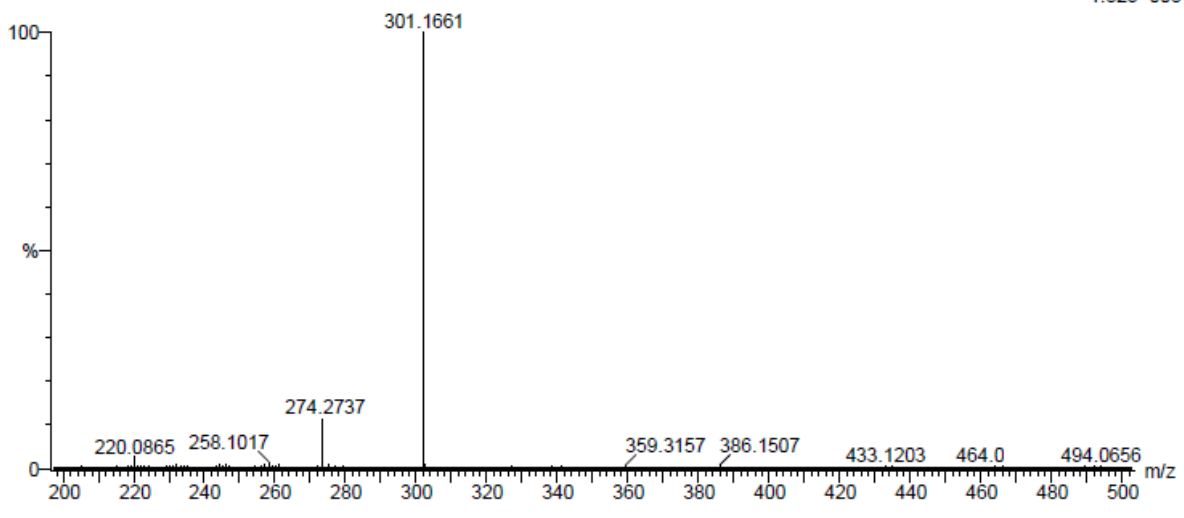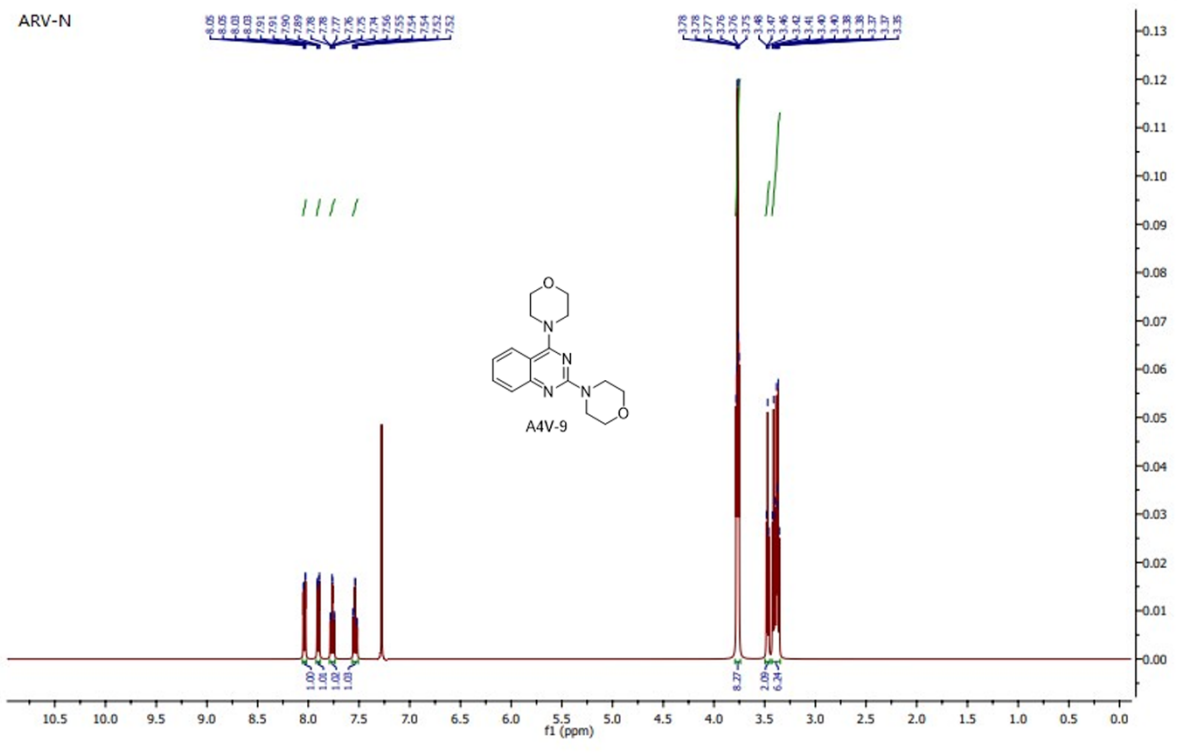

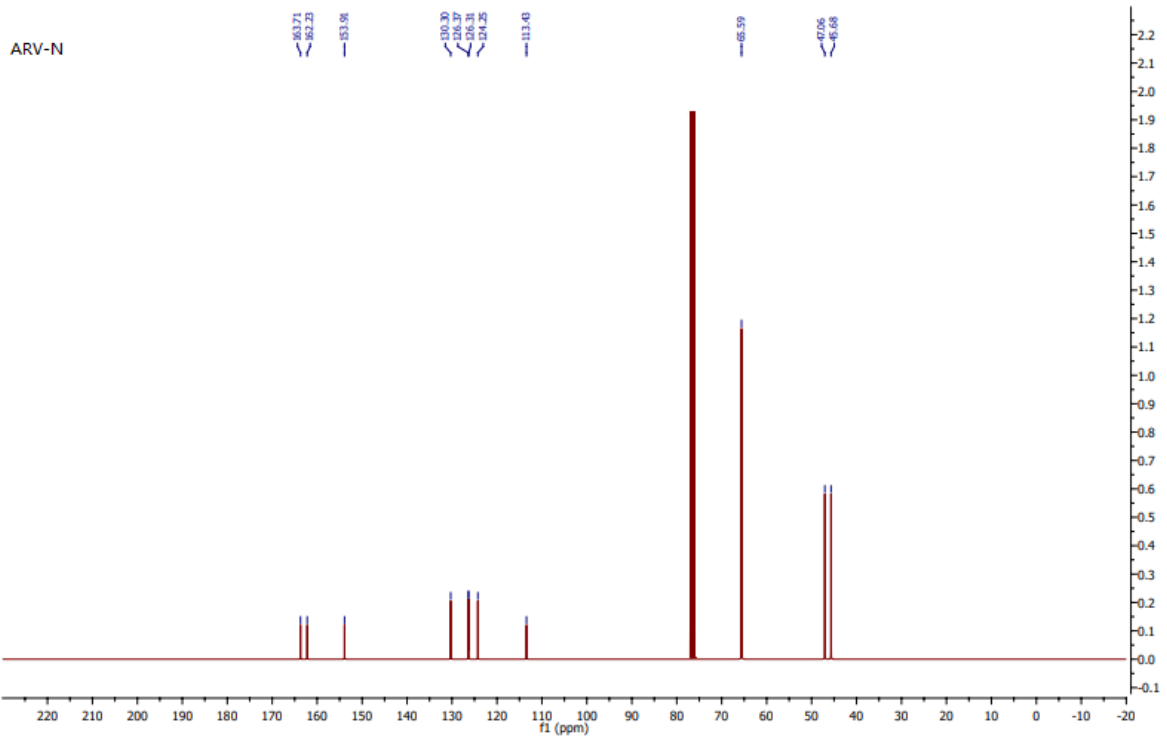

### A4V-10

Sample Name : A4V-10  
 Test Name : HRMS-1

IITRPR

XEVO G2-XS QTOF

1: TOF MS ES+  
 5.52e+007

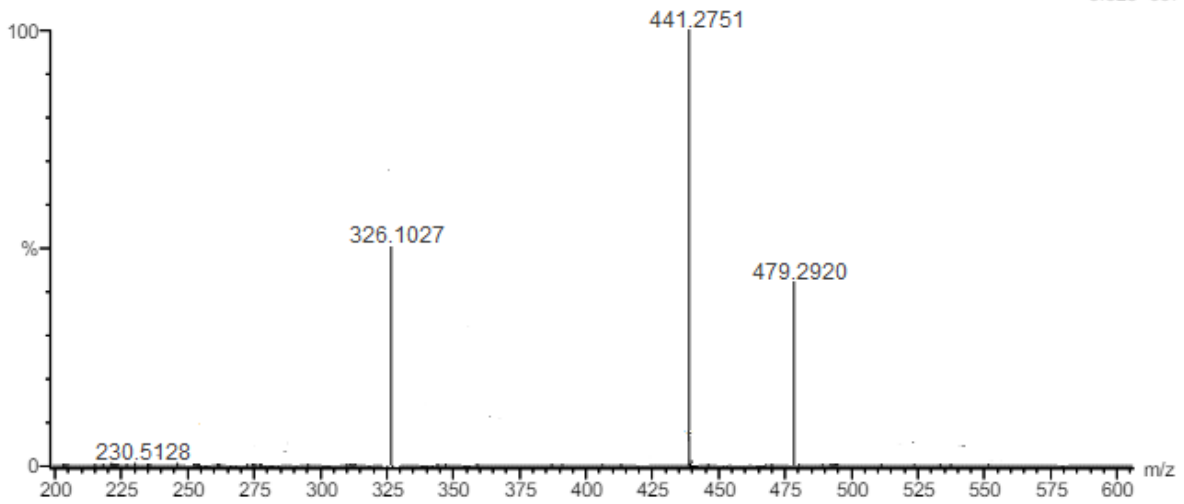

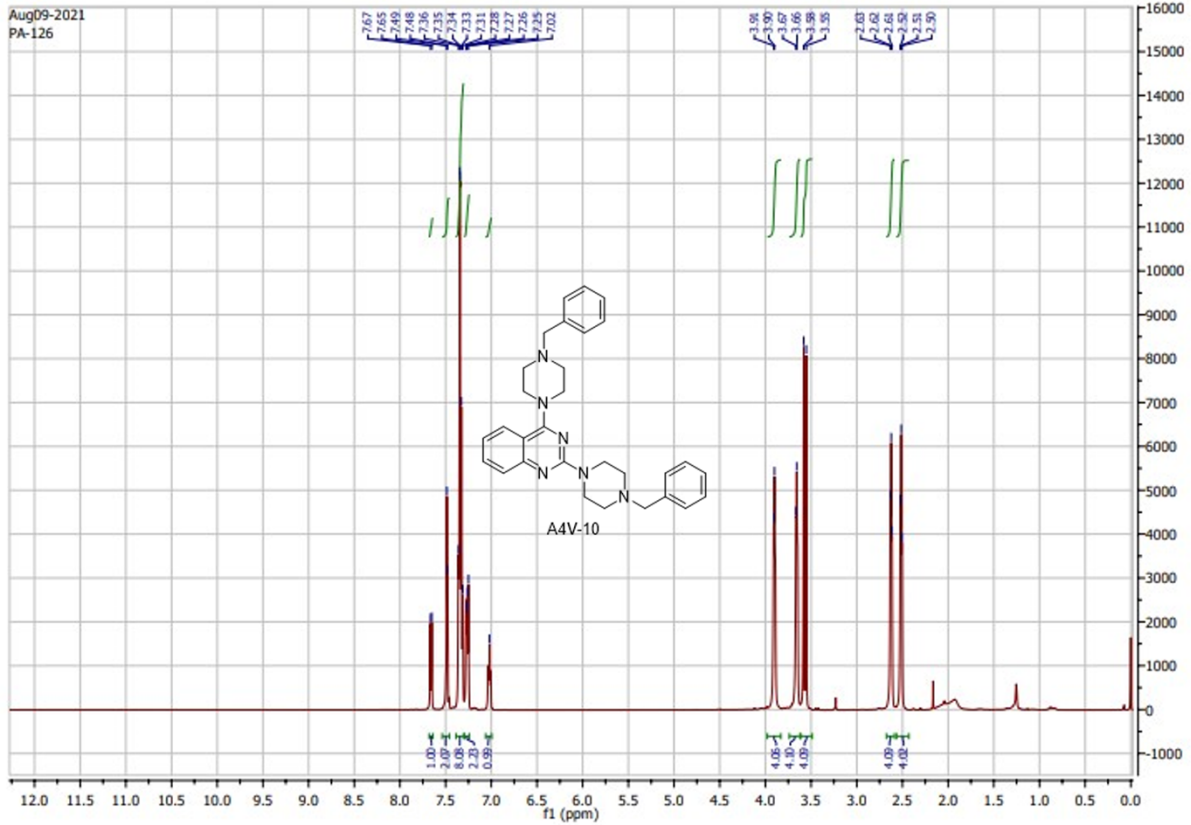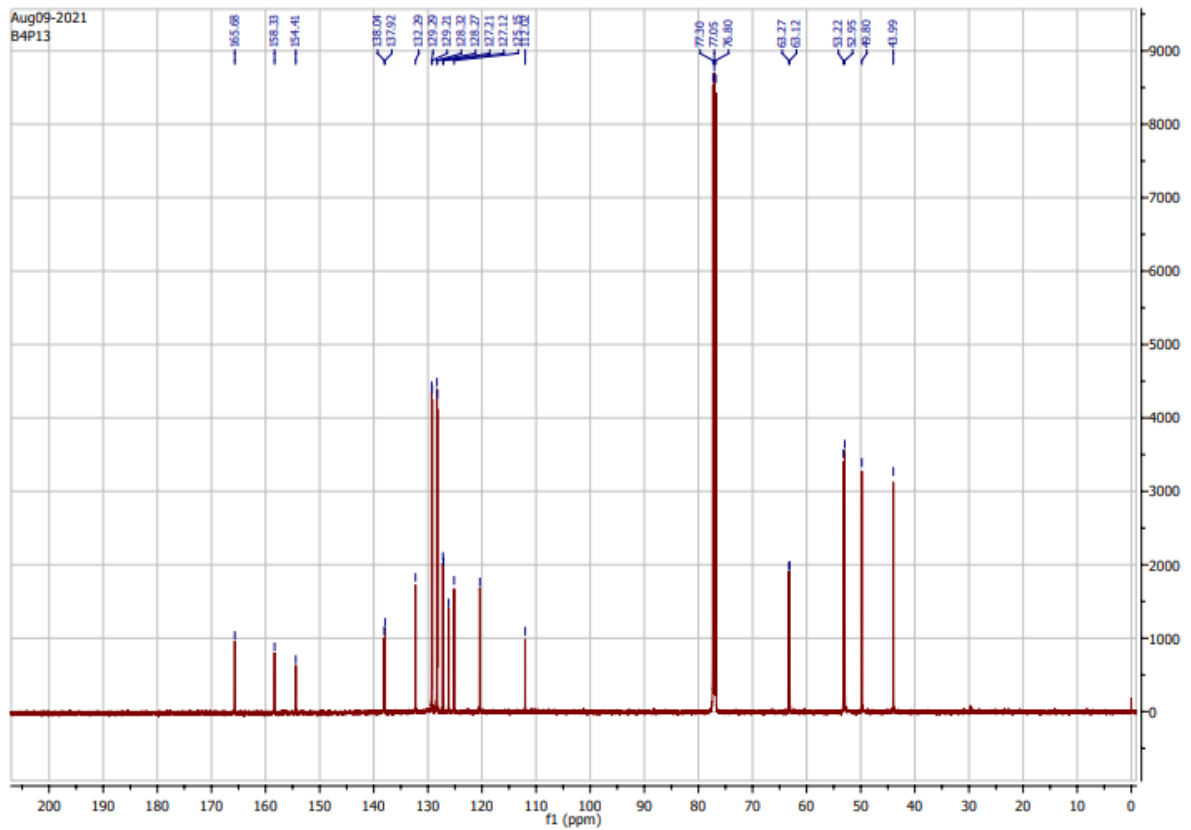



# A4V-11

Sample Name : A4V-11  
Test Name : HRMS-1

IITRPR

XEVO G2-XS QTOF

1: TOF MS ES+  
5.52e+007

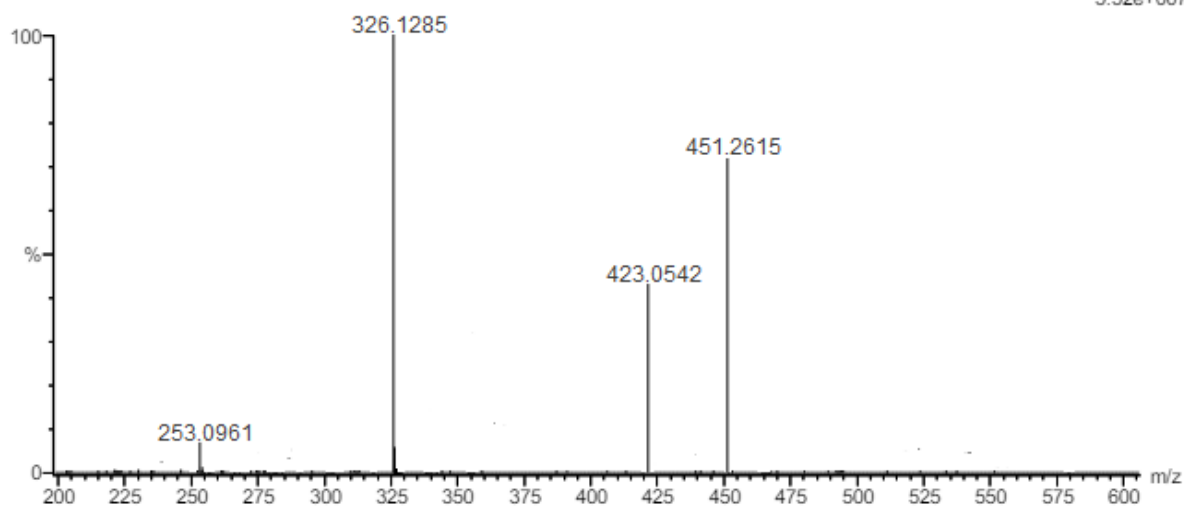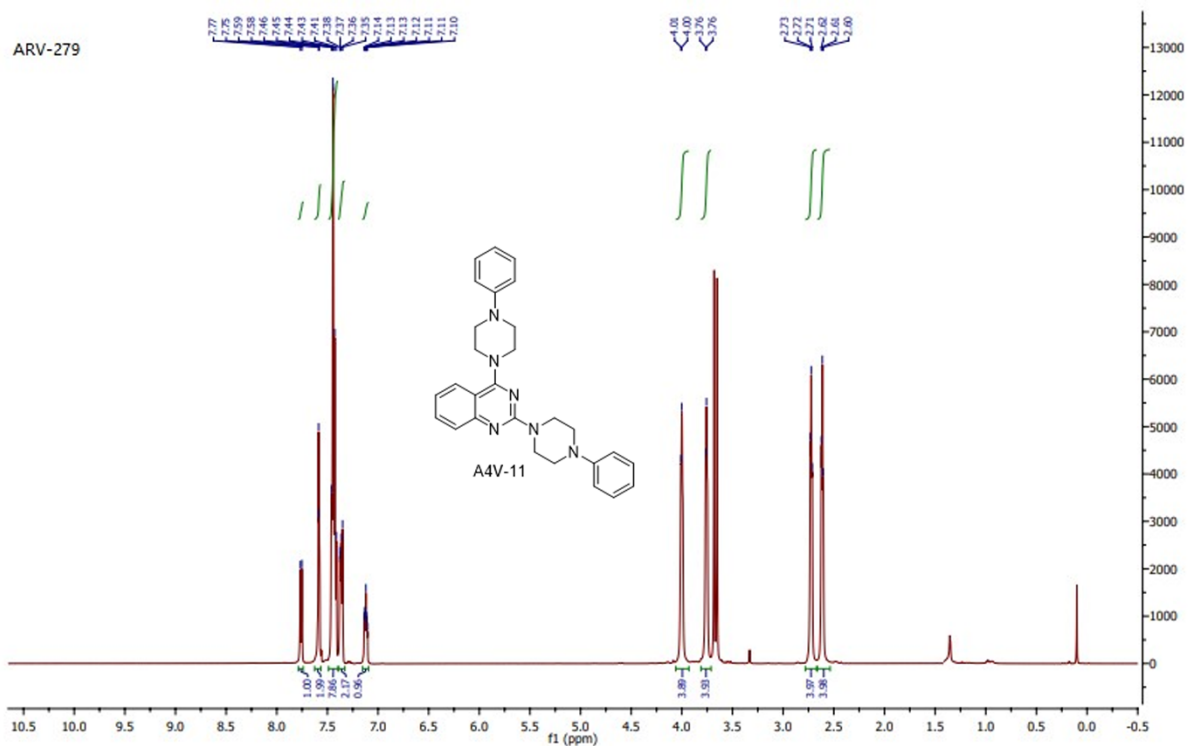

ARV-279

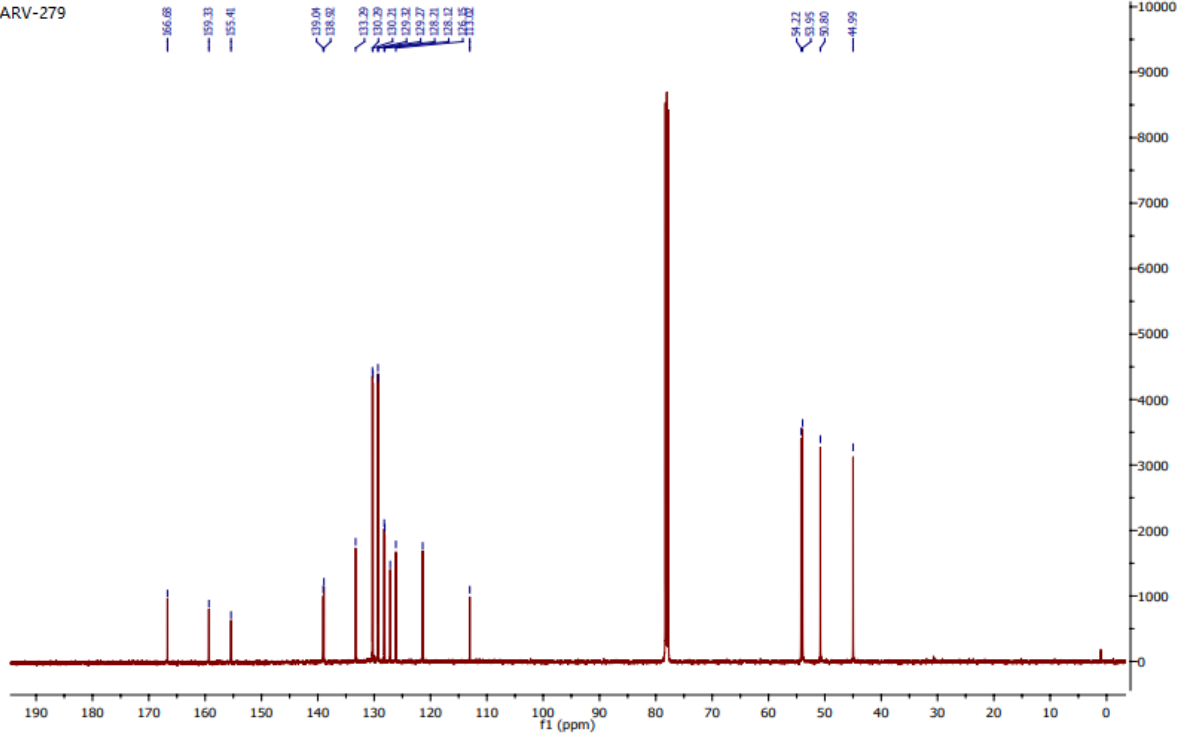

A4V-12 Reported compound

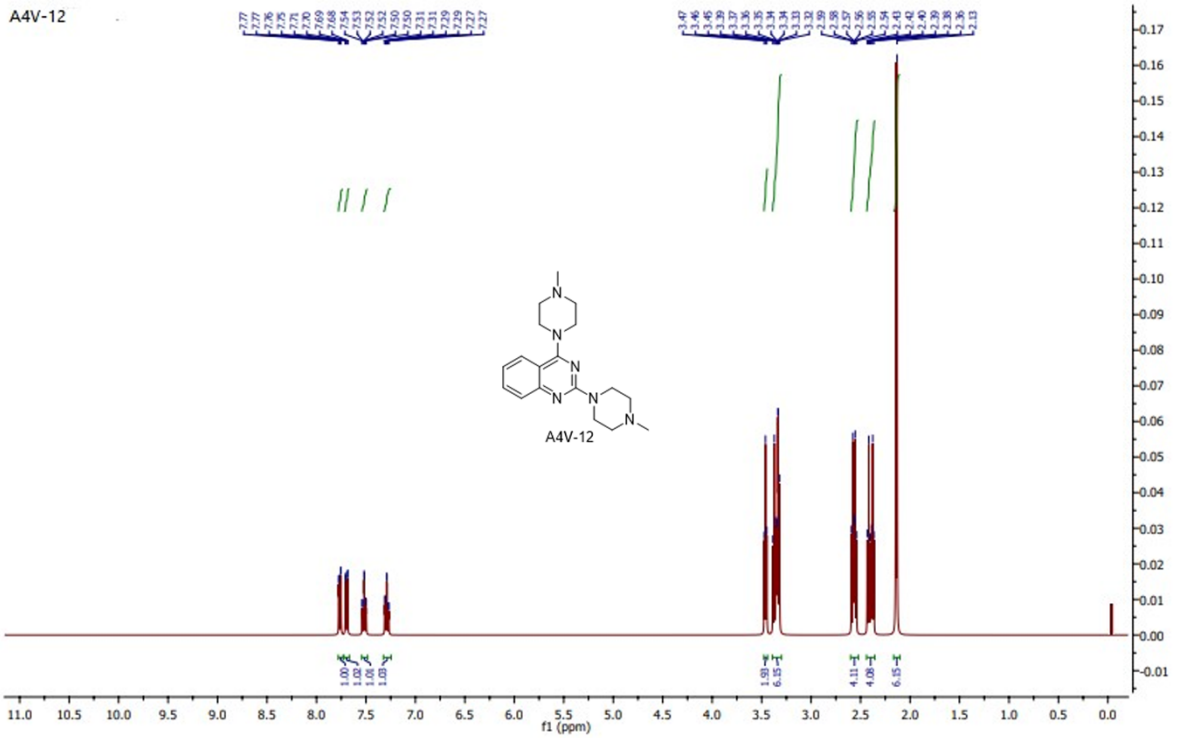

Supplement: d4md00755g1.pdf [file d4md00755g1.pdf]
